# Supplementary material for: On the Donor: Acceptor Features for Poly(3-hexylthiophene): TiO2 Quantum Dots Hybrid Materials Obtained via Water Vapor Flow Assisted Sol-Gel Growth
Source: MDPI journal article supplement (doi:10.3390/polym15071706), 2023-03-29
Supplement: s1 [file s1]

## **SUPPORTING INFORMATION**

### **On the donor:acceptor features for poly(3-hexylthiophene):TiO<sub>2</sub> quantum dots hybrid materials obtained via water vapor flow assisted sol-gel growth**

Dominique Mombrú, Mariano Romero\*, Ricardo Faccio\* and Álvaro W. Mombrú\*.

Centro NanoMat & Área Física, Departamento de Experimentación y Teoría de la Estructura de la Materia y sus Aplicaciones (DETEMA), Facultad de Química, Universidad de la República, Montevideo C.P. 11800, Uruguay.

(\*) corresponding authors:

Prof. Dr. Mariano Romero (mromero@fq.edu.uy)

Prof. Dr. Ricardo Faccio (rfaccio@fq.edu.uy)

Prof. Dr. Álvaro Mombrú (amombru@fq.edu.uy)

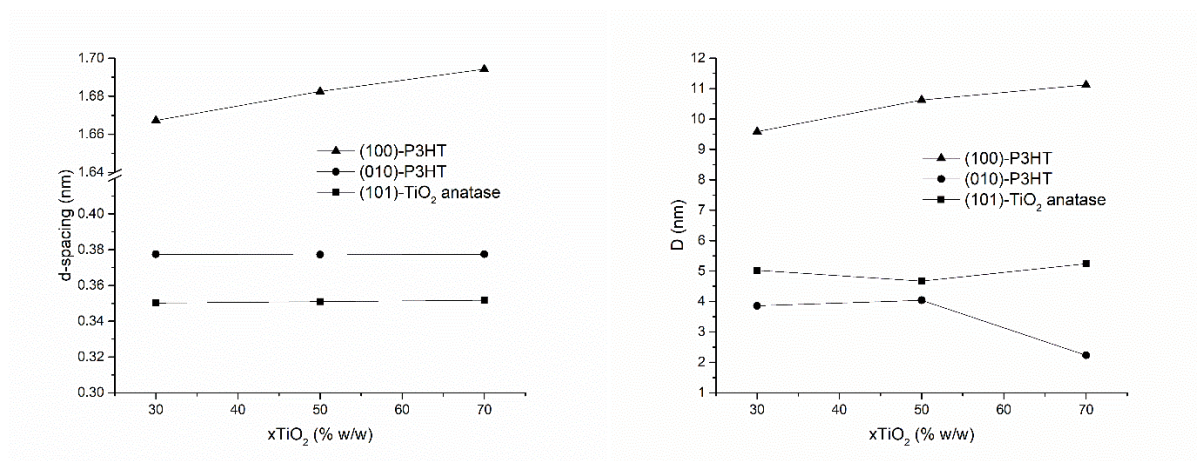

**Figure S1.** Selected d-spacing and mean crystalline size as a function of  $\text{TiO}_2$ -QDs concentration.

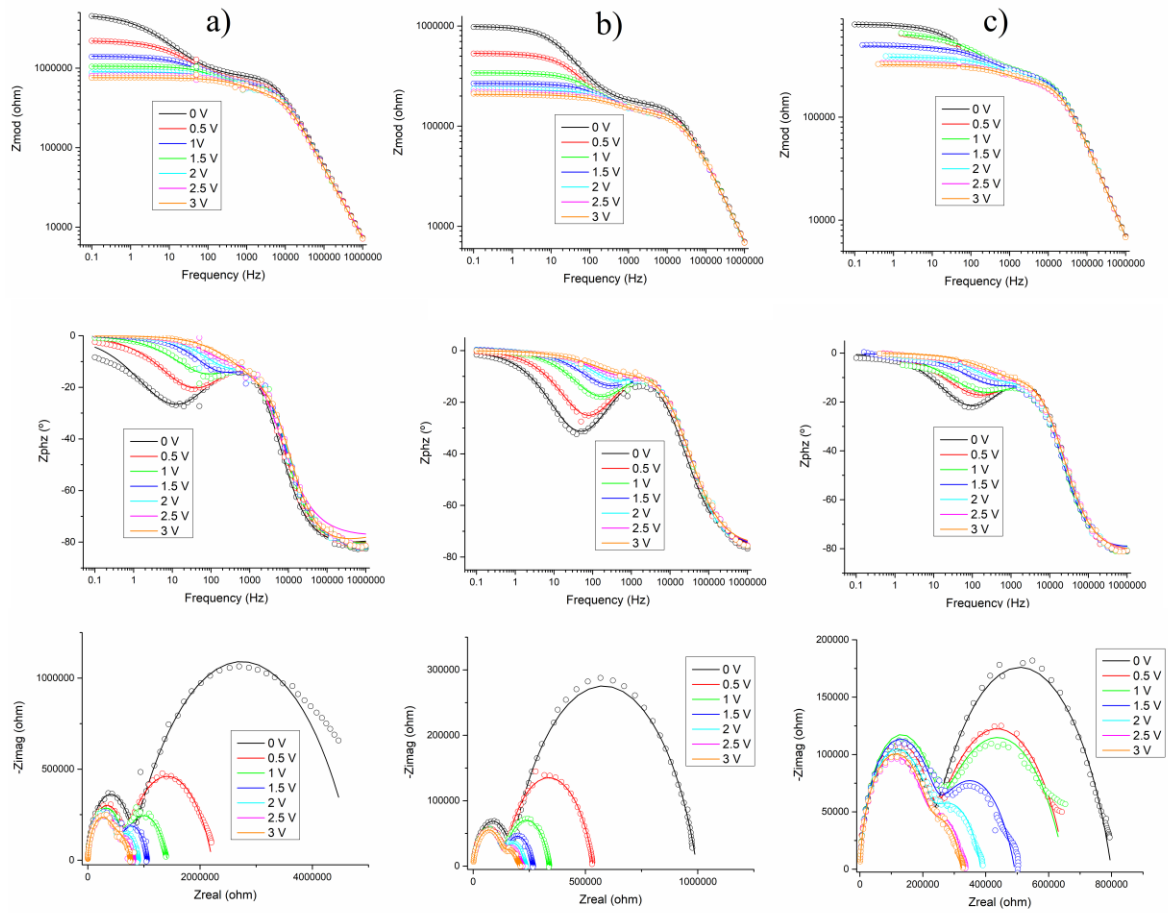

**Figure S2.** Impedance modulus (upper panel) and phase (middle panel) versus frequency, and Nyquist (lower panel) for a) x30, b) x50 and c) x70 at  $V_{DC} = 0 - 3$  V.
